# Supplementary material
Source: Springer Nature journal article supplement (https://www.springermedizin.de/resource/supplementary/12985_2014_2471_MOESM9_ESM.pdf/9606814)

# Supplementary Figure 1

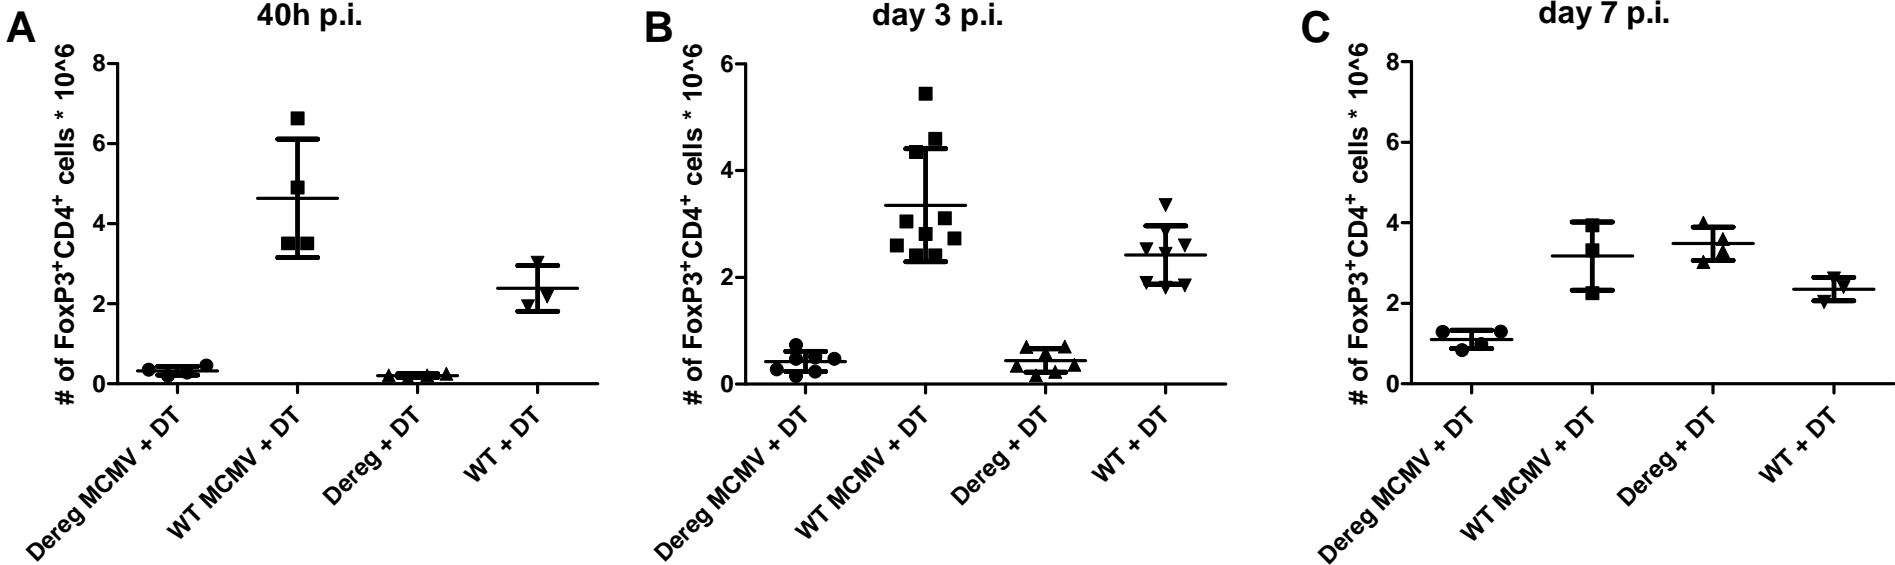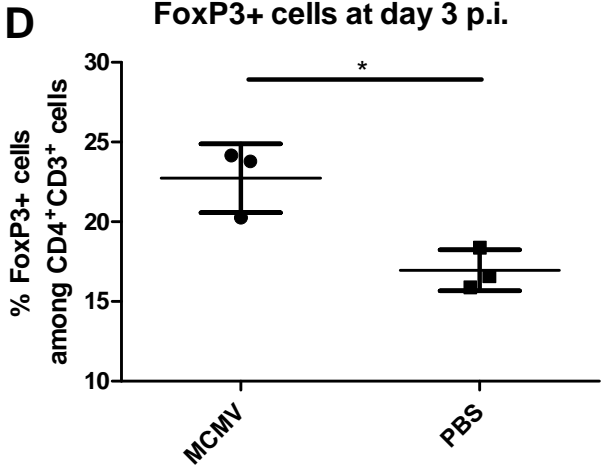

Supplement: MOESM9 [file 9606814]
